# Supplementary material for: Postmortem transcriptional profiling reveals widespread increase in inflammation in schizophrenia: a comparison of prefrontal cortex, striatum, and hippocampus among matched tetrads of controls with subjects diagnosed with schizophrenia, bipolar or major depressive disorder
Source: PubMed Central journal article supplement (PMC6533277; doi:10.1038/s41398-019-0492-8), 2019-05-23

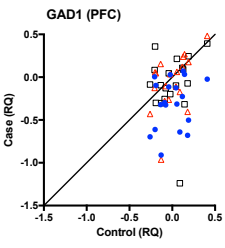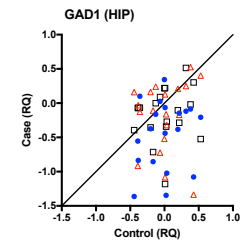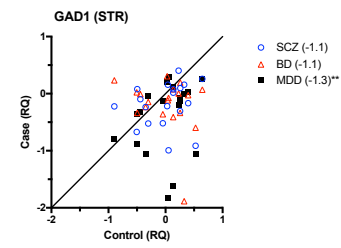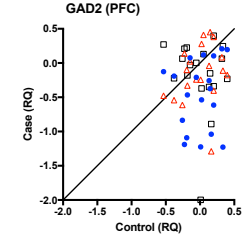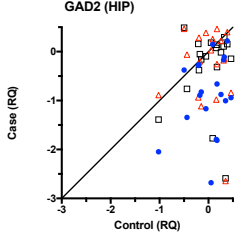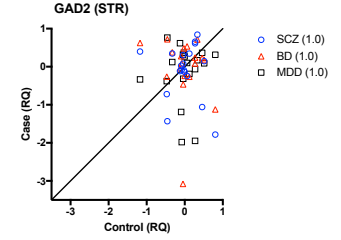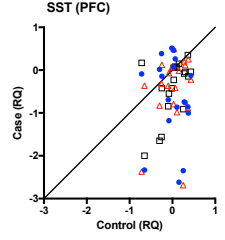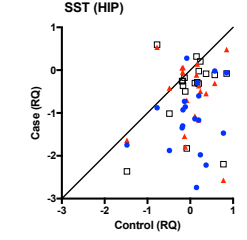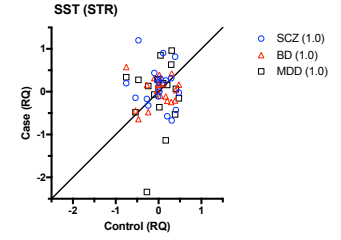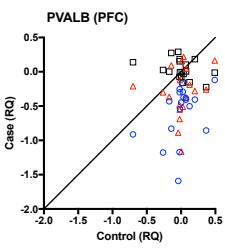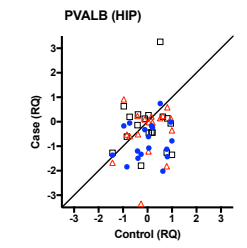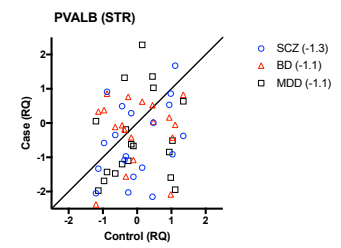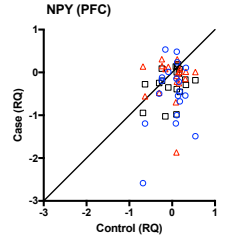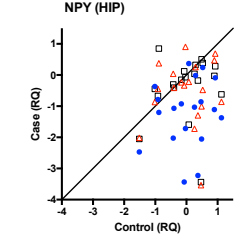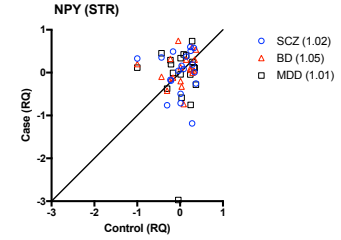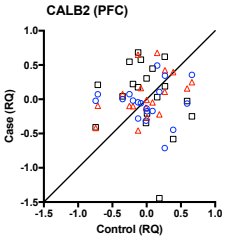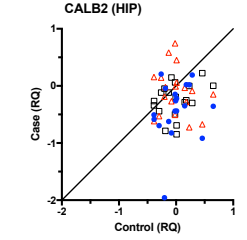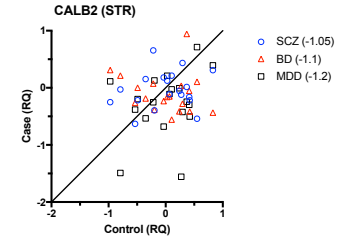

Supplement: 41398_2019_492_MOESM4_ESM.pdf [file 41398_2019_492_MOESM4_ESM.pdf]
